# Supplementary material for: Evaluation of Radioiodinated Fluoronicotinamide/Fluoropicolinamide-Benzamide Derivatives as Theranostic Agents for Melanoma
Source: PubMed Central journal article supplement (PMC7554940; doi:10.3390/ijms21186597), 2020-09-09
Supplement: ijms-21-06597-s001.pdf [file ijms-21-06597-s001.pdf]

**Supplementary Materials:**

**Table S1.** Radioactivity biodistribution of A375 amelanotic melanoma-bearing BALB/c nude mice after intravenous injection of 20  $\mu$ Ci of  $^{131}\text{I}$ -IFNABZA.

| Organ        | 5 min            | 15 min            | 1h               | 4h                | 24h             | 48h             | 96h             |
|--------------|------------------|-------------------|------------------|-------------------|-----------------|-----------------|-----------------|
| Blood        | 1.42 $\pm$ 0.35  | 1.27 $\pm$ 0.34   | 0.85 $\pm$ 0.15  | 0.20 $\pm$ 0.04   | 0.04 $\pm$ 0.00 | 0.02 $\pm$ 0.00 | 0.01 $\pm$ 0.01 |
| Heart        | 7.34 $\pm$ 1.68  | 4.29 $\pm$ 0.44   | 1.26 $\pm$ 0.30  | 0.36 $\pm$ 0.10   | 0.12 $\pm$ 0.01 | 0.08 $\pm$ 0.01 | 0.06 $\pm$ 0.01 |
| Lung         | 24.31 $\pm$ 4.86 | 10.94 $\pm$ 1.34  | 4.54 $\pm$ 0.94  | 2.31 $\pm$ 0.48   | 0.26 $\pm$ 0.06 | 0.09 $\pm$ 0.03 | 0.06 $\pm$ 0.01 |
| Liver        | 14.07 $\pm$ 0.54 | 16.19 $\pm$ 0.42  | 9.75 $\pm$ 2.59  | 3.82 $\pm$ 0.64   | 2.15 $\pm$ 0.08 | 1.51 $\pm$ 0.15 | 0.93 $\pm$ 0.18 |
| Stomach      | 3.33 $\pm$ 0.23  | 3.62 $\pm$ 0.33   | 3.49 $\pm$ 2.35  | 0.70 $\pm$ 0.23   | 0.15 $\pm$ 0.02 | 0.06 $\pm$ 0.01 | 0.03 $\pm$ 0.01 |
| Small int.   | 5.70 $\pm$ 1.01  | 8.09 $\pm$ 0.91   | 4.47 $\pm$ 1.48  | 0.56 $\pm$ 0.05   | 0.09 $\pm$ 0.02 | 0.04 $\pm$ 0.01 | 0.02 $\pm$ 0.01 |
| Large int.   | 3.93 $\pm$ 0.89  | 3.39 $\pm$ 0.45   | 2.10 $\pm$ 0.57  | 1.37 $\pm$ 0.42   | 0.07 $\pm$ 0.02 | 0.02 $\pm$ 0.01 | 0.01 $\pm$ 0.01 |
| Spleen       | 6.77 $\pm$ 1.57  | 8.59 $\pm$ 0.82   | 7.06 $\pm$ 1.31  | 3.13 $\pm$ 0.59   | 1.86 $\pm$ 0.41 | 1.16 $\pm$ 0.19 | 0.75 $\pm$ 0.14 |
| Pancreas     | 8.62 $\pm$ 1.38  | 7.08 $\pm$ 0.19   | 3.72 $\pm$ 0.99  | 1.56 $\pm$ 0.52   | 0.31 $\pm$ 0.08 | 0.11 $\pm$ 0.01 | 0.07 $\pm$ 0.01 |
| Bone         | 1.74 $\pm$ 0.17  | 1.84 $\pm$ 0.02   | 0.98 $\pm$ 0.19  | 0.36 $\pm$ 0.08   | 0.09 $\pm$ 0.01 | 0.04 $\pm$ 0.01 | 0.02 $\pm$ 0.01 |
| Muscle       | 2.20 $\pm$ 0.21  | 1.48 $\pm$ 0.37   | 0.69 $\pm$ 0.23  | 0.12 $\pm$ 0.03   | 0.03 $\pm$ 0.00 | 0.01 $\pm$ 0.01 | 0.01 $\pm$ 0.00 |
| Tumor        | 1.66 $\pm$ 0.39  | 1.68 $\pm$ 0.23   | 1.73 $\pm$ 0.51  | 0.34 $\pm$ 0.07   | 0.10 $\pm$ 0.05 | 0.05 $\pm$ 0.02 | 0.02 $\pm$ 0.01 |
| Brain        | 0.71 $\pm$ 0.16  | 0.48 $\pm$ 0.01   | 0.17 $\pm$ 0.04  | 0.02 $\pm$ 0.00   | 0.00 $\pm$ 0.00 | 0.00 $\pm$ 0.00 | 0.00 $\pm$ 0.00 |
| Kidneys      | 27.07 $\pm$ 3.54 | 25.15 $\pm$ 1.97  | 12.06 $\pm$ 3.05 | 5.13 $\pm$ 1.52   | 0.99 $\pm$ 0.15 | 0.37 $\pm$ 0.02 | 0.19 $\pm$ 0.01 |
| Eye ball     | 1.20 $\pm$ 0.26  | 1.11 $\pm$ 0.16   | 0.80 $\pm$ 0.19  | 0.28 $\pm$ 0.09   | 0.04 $\pm$ 0.01 | 0.01 $\pm$ 0.01 | 0.00 $\pm$ 0.00 |
| Urine        | 2.44 $\pm$ 0.18  | 42.30 $\pm$ 34.83 | 175.9 $\pm$ 94.4 | 20.39 $\pm$ 9.71  | 0.57 $\pm$ 0.09 | 0.14 $\pm$ 0.08 | 0.05 $\pm$ 0.02 |
| Feces        | 1.12 $\pm$ 0.28  | 2.64 $\pm$ 0.89   | 15.96 $\pm$ 5.57 | 73.25 $\pm$ 26.98 | 6.23 $\pm$ 4.04 | 0.82 $\pm$ 0.20 | 0.20 $\pm$ 0.05 |
| Bladder      | 1.69 $\pm$ 0.37  | 2.11 $\pm$ 0.67   | 1.56 $\pm$ 0.79  | 0.42 $\pm$ 0.25   | 0.04 $\pm$ 0.02 | 0.02 $\pm$ 0.01 | 0.00 $\pm$ 0.00 |
| Uptake ratio |                  |                   |                  |                   |                 |                 |                 |
| Tumor/muscle | 0.75 $\pm$ 0.19  | 1.14 $\pm$ 0.32   | 2.04 $\pm$ 0.70  | 1.70 $\pm$ 0.49   | 2.50 $\pm$ 1.25 | 2.50 $\pm$ 1.00 | 2.00 $\pm$ 1.00 |
| Tumor/blood  | 1.17 $\pm$ 0.40  | 1.32 $\pm$ 0.40   | 2.51 $\pm$ 1.12  | 2.83 $\pm$ 0.92   | 3.33 $\pm$ 2.00 | 5.00 $\pm$ 5.39 | N/A             |
| Tumor/liver  | 0.12 $\pm$ 0.03  | 0.10 $\pm$ 0.01   | 0.85 $\pm$ 0.15  | 0.20 $\pm$ 0.04   | 0.04 $\pm$ 0.00 | 0.02 $\pm$ 0.00 | 0.01 $\pm$ 0.01 |

Results were expressed as the percentage of injected dose per gram of organ/tissue (%ID/g). Each value represented mean  $\pm$  SD ( $n = 4$ ). Small int., small intestine; large int., large intestine.

**Table S2.** Radioactivity biodistribution of healthy BALB/c mice at 5 min post administration of 20 mCi of  $^{131}\text{I}$ -IFNABZA dissolved in different excipients.

| Organ   | Excipient A |   | Excipient B |       | Excipient C |      |       |   |      |
|---------|-------------|---|-------------|-------|-------------|------|-------|---|------|
| Blood   | 1.34        | ± | 0.40        | 1.08  | ±           | 0.12 | 1.10  | ± | 0.07 |
| Lung    | 14.28       | ± | 1.86        | 16.00 | ±           | 1.64 | 15.11 | ± | 2.11 |
| Liver   | 16.32       | ± | 2.19        | 16.26 | ±           | 1.50 | 20.18 | ± | 1.45 |
| Kidneys | 25.47       | ± | 1.16        | 26.21 | ±           | 2.08 | 28.59 | ± | 1.90 |
| Muscle  | 1.84        | ± | 0.21        | 1.99  | ±           | 0.19 | 1.87  | ± | 0.31 |

Excipient A: 10% ethanol in normal saline

Excipient B: 5% Tween 80 and 5% ethanol in normal saline

Excipient C: 1% bovine serum albumin and 5% ethanol in normal saline

Results were expressed as the percentage of injected dose per gram of organ/tissue (%ID/g). Each value represented mean  $\pm$  SD ( $n = 5$ ).

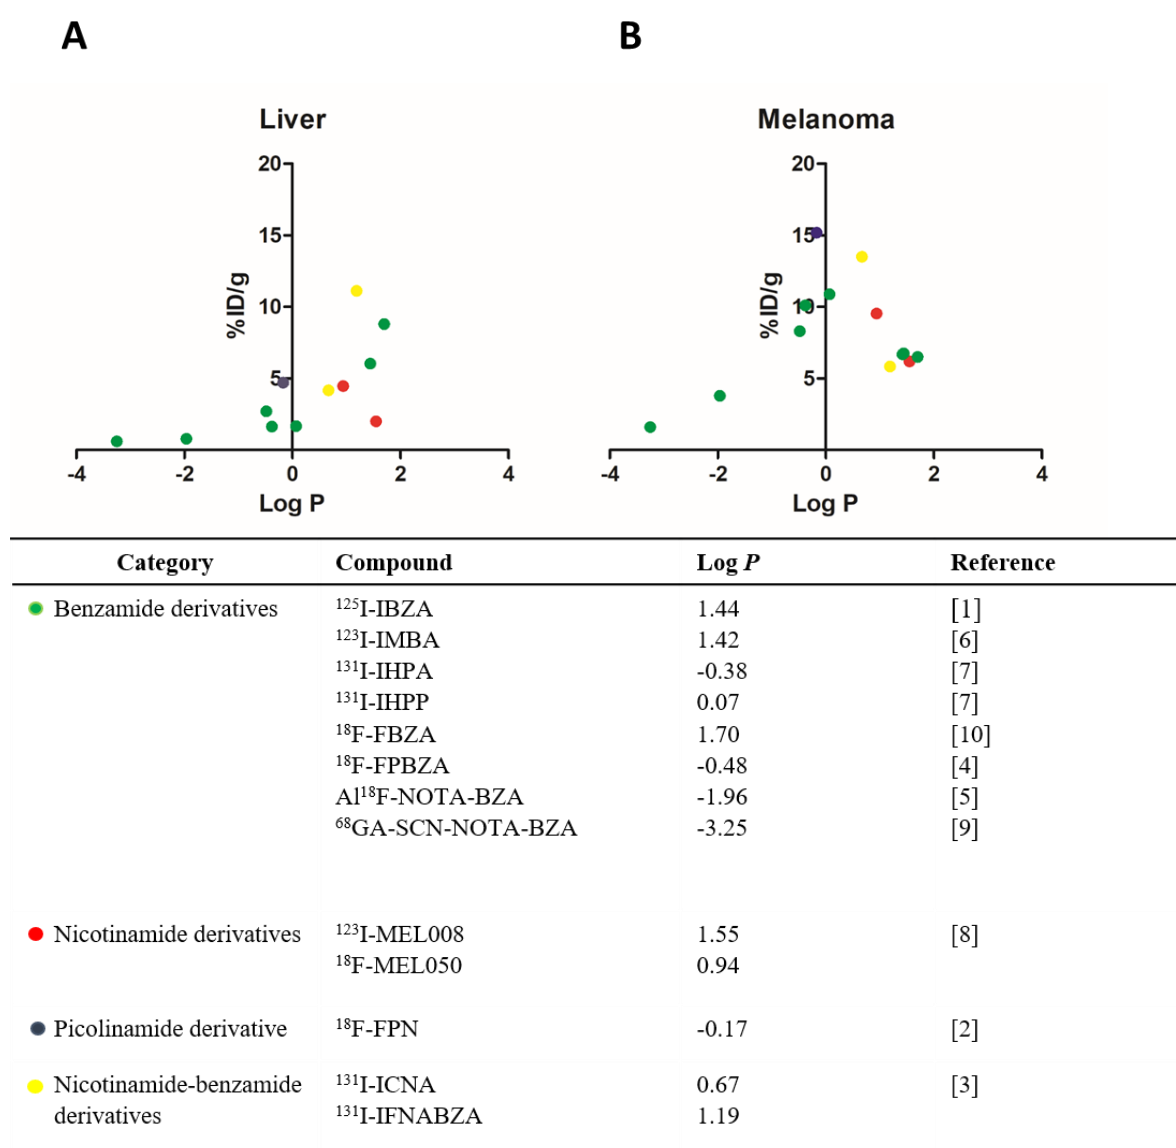

**Figure S1.** The relationship between lipophilicity and radioactivity accumulation of radiolabeled ligands in (A) liver and (B) melanoma. The data were collected based on previous literature. Green dots: Benzamide derivatives [1,4–7,9,10]; red dots: Nicotinamide derivatives [8]; black dots: Picolinamide derivative [2]; yellow dots: Nicotinamide-benzamide derivatives [3]

## Reference

1. Michelot, J.M.; Moreau, M.F.; Veyre, A.J.; Bonafous, J.F.; Bacin, F.J.; Madelmont, J.C.; Bussiere, F.; Souteyrand, P.A.; Mauclaire, L.P.; Chossat, F.M.; et al. Phase II scintigraphic clinical trial of malignant melanoma and metastases with iodine-123-N-(2-diethylaminoethyl 4-iodobenzamide). *J. Nucl. Med.* **1993**, *34*, 1260–1266.
2. Greguric, I.; Taylor, S.R.; Denoyer, D.; Ballantyne, P.; Berghofer, P.; Roselt, P.; Pham, T.Q.; Mattner, F.; Bourdier, T.; Neels, O.C.; et al. Discovery of [<sup>18</sup>F]N-(2-(diethylamino)ethyl)-6-fluoronicotinamide: A melanoma positron emission tomography imaging radiotracer with high tumor to body contrast ratio and rapid renal clearance. *J. Med. Chem.* **2009**, *52*, 5299–5302.
3. Chang, C.C.; Chang, C.H.; Shen, C.C.; Chen, C.L.; Liu, R.S.; Lin, M.H.; Wang, H.E. Synthesis and evaluation of <sup>123/131</sup>I-Iochlonicotinamide as a novel SPECT probe for malignant melanoma. *Bioorg. Med. Chem.* **2015**, *23*, 2261–2269.
4. Wu, S.Y.; Huang, S.P.; Lo, Y.C.; Liu, R.S.; Wang, S.J.; Lin, W.J.; Shen, C.C.; Wang, H.E. Synthesis and preclinical characterization of [<sup>18</sup>F]FPBZA: A novel PET probe for melanoma. *Biomed. Res. Int.* **2014**, *2014*, 912498, doi:10.1155/2014/912498.
5. Chang, C.C.; Chang, C.H.; Lo, Y.H.; Lin, M.H.; Shen, C.C.; Liu, R.S.; Wang, H.E.; Chen, C.L. Preparation and characterization of a novel Al<sup>18</sup>F-NOTA-BZA conjugate for melanin-targeted imaging of malignant melanoma. *Bioorg. Med. Chem. Lett.* **2016**, *26*, 4133–4139.
6. Nicholl, C.; Mohammed, A.; Hull, W.E.; Bubeck, B.; Eisenhut, M. Pharmacokinetics of iodine-123-IMBA for melanoma imaging. *J. Nucl. Med.* **1997**, *38*, 127–133.
7. Chang, C.C.; Chang, C.H.; Shen, C.C.; Chen, C.L.; Liu, R.S.; Lin, M.H.; Wang, H.E. Synthesis and characterization of a novel radioiodinated phenylacetamide and its homolog as theranostic agents for malignant melanoma. *Eur. J. Pharm. Sci.* **2016**, *81*, 201–209.
8. Chezal, J.M.; Papon, J.; Labarre, P.; Lartigue, C.; Galmier, M.J.; Decombat, C.; Chavignon, O.; Maublant, J.; Teulade, J.C.; Madelmont, J.C.; et al. Evaluation of radiolabeled (hetero)aromatic analogues of N-(2-diethylaminoethyl)-4-iodobenzamide for imaging and targeted radionuclide therapy of melanoma. *J. Med. Chem.* **2008**, *51*, 3133–3144.
9. Kim, H.J.; Kim, D.Y.; Park, J.H.; Yang, S.D.; Hur, M.G.; Min, J.J.; Yu, K.H. Synthesis and characterization of a <sup>68</sup>Ga-labeled N-(2-diethylaminoethyl)benzamide derivative as potential PET probe for malignant melanoma. *Bioorg. Med. Chem.* **2012**, *20*, 4915–4920.
10. Ren, G.; Miao, Z.; Liu, H.; Jiang, L.; Limpa-Amara, N.; Mahmood, A.; Gambhir, S.S.; Cheng, Z. Melanin-targeted preclinical PET imaging of melanoma metastasis. *J. Nucl. Med.* **2009**, *50*, 1692–1699.
